# Supplementary material
Source: PubMed Central journal article supplement (PMC2944050)
Supplement: emboj2010169s1.pdf [file emboj2010169s1.pdf]

## Supplemental figure legends

**Figure S1.** Modified Ups1 and Ups2 variants harboring C-terminal tags restore normal phospholipid levels upon expression in  $\Delta ups1$  and  $\Delta ups2$  cells, respectively. The mitochondrial phospholipid profile was determined in wild type cells (WT, CG214),  $\Delta ups1$  cells (PD49),  $\Delta ups2$  cells (CG233), or cells expressing genomically modified *UPS1* (CG593, CG598, CG630) or *UPS2* (CG591, CG597, CG626) by TLC. The asterisk (\*) indicates an unidentified lipid species.

**Figure S2.** Ups1 and Ups2 are present in independent protein complexes in the intermembrane space. Mitochondria (1 mg of protein) isolated from wild type cells (WT) and  $\Delta ups1$  cells harboring Ups2<sup>HA</sup> expressed genomically (PD17, PD94) were resuspended at a protein concentration of 5 mg/ml in 1% (v/v) Triton X-100, 30 mM Tris/HCl pH 7.4, 150 mM K-acetate pH 7.4, 4 mM Mg-acetate, 1 mM PMSF and solubilized for 30 min at 4°C. After a clarifying spin for 20 min at 18,000 rpm, the supernatant was subjected to size exclusion chromatography using a Superose-12 column (GE Healthcare), equilibrated with 0.05% (v/v) Triton X-100, 30 mM Tris/HCl pH 7.4, 150 mM K-acetate pH 7.4, 4 mM Mg-acetate, 1 mM PMSF. Eluate fractions were TCA-precipitated and analyzed by SDS-PAGE and immunoblotting using HA-specific antibodies.

**Figure S3.** Specificity of Ups1 and Ups2 antibodies. Mitochondria isolated from wild type cells (WT, CG214) or cells lacking Yme1, Ups1, or Ups2 as indicated (CG113, PY132, PY153) were analyzed by SDS-PAGE and immunoblotting using Yme1-, Tom40- and affinity purified Ups1- and Ups2-antibodies.

**Figure S4.** (A) Import of Ups1, Ups2 and Su9-DHFR in  $\Delta mdm35$  and  $\Delta mdm35\Delta yme1$  mitochondria. <sup>35</sup>S-labeled Ups1, Ups2 and Su9-DHFR were imported into wild type (WT,

CG1),  $\Delta mdm35$  (CG323) and  $\Delta mdm35\Delta yme1$  (CW414) mitochondria for the indicated time.

Samples were analyzed by SDS-PAGE and autoradiography. **(B)** Membrane potential of mitochondria isolated from the indicated strains was measured using the potential sensitive dye DiSC(3). Data represent  $\pm$  standard deviation of three independent measurements.

\* $p < 0.05$ , \*\*\*  $p < 0.0005$

**Fig. S1**

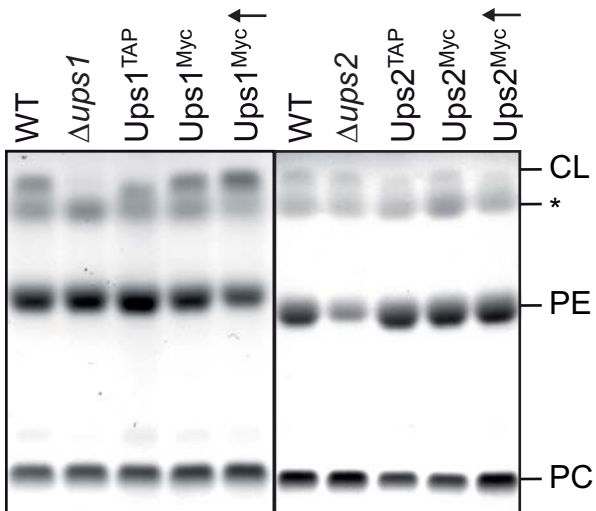

**Fig. S3**

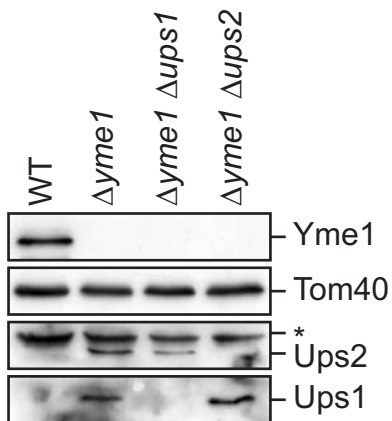

**Fig. S2**

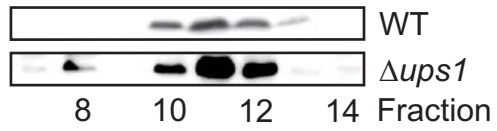

**Fig. S4**

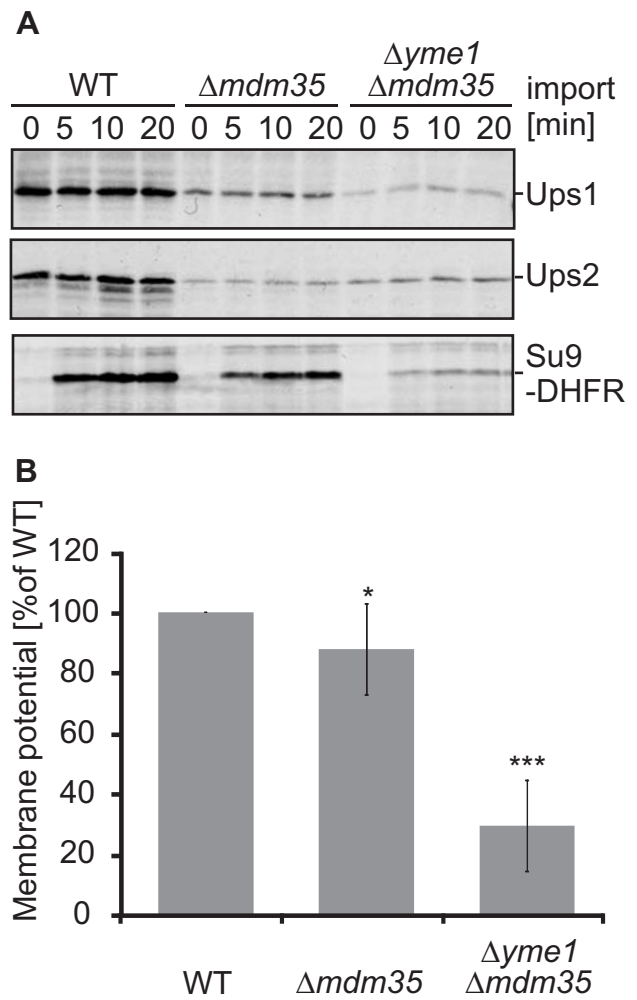

Table S1 Yeast strains used in this study

| Strain Name               | Alternative strain name    | Back-ground | Mat | Genotype                                                                                             |
|---------------------------|----------------------------|-------------|-----|------------------------------------------------------------------------------------------------------|
| CG1                       | WT                         | W303        | a   | <i>can1Δ100 his3Δ11,15 leu2Δ3,112 ura3Δ1 ade2Δ1 trp1Δ1</i>                                           |
| CG113<br>(Euroscarf 7144) | <i>Δyme1</i>               | S288c       | a   | <i>his3Δ1 leu2Δ0 met15Δ0 ura3Δ0 yme1::kanMX</i>                                                      |
| CG214                     | WT                         | S288c       | a   | <i>his3Δ1 leu2Δ0 met15Δ0 lys2Δ0 ura3Δ0</i>                                                           |
| CG233                     | <i>Δups2</i>               | S288c       | a   | <i>his3Δ1 leu2Δ0 met15Δ0 lys2Δ0 ura3Δ0 Δups2::NAT Δyme1::kanMX</i>                                   |
| CG278                     | <i>Δphb1 [PHB1]</i>        | W303        | a   | <i>can1Δ100 his3Δ11,15 leu2Δ3,112 ura3Δ1 ade2Δ1 trp1Δ1 Δphb1::NAT pCM189-PHB1</i>                    |
| CG287                     | <i>Δphb1 Δmdm35 [PHB1]</i> | W303        | a   | <i>can1Δ100 his3Δ11,15 leu2Δ3,112 ura3Δ1 ade2Δ1 trp1Δ1 Δmdm35::kanMX Δphb1::NAT pCM189-PHB1</i>      |
| CG323                     | <i>Δmdm35</i>              | W303        | a   | <i>can1Δ100 his3Δ11,15 leu2Δ3,112 ura3Δ1 ade2Δ1 trp1Δ1 Δmdm35::kanMX</i>                             |
| CG324                     | <i>Δmdm35</i>              | W303        | α   | <i>can1Δ100 his3Δ11,15 leu2Δ3,112 ura3Δ1 ade2Δ1 trp1Δ1 Δmdm35::kanMX</i>                             |
| CG524                     | <i>Δmdm35</i>              | S288c       | a   | <i>his3Δ1 leu2Δ0 met15Δ0 lys2Δ0 ura3Δ0 Δmdm35::kanMX</i>                                             |
| CG560                     | <i>Δmdm35</i>              | S288c       | α   | <i>can1Δ0 his3Δ0 ura3Δ0 lys3Δ0 Δmfa1::MFA1prHIS3 Δmdm35::NAT</i>                                     |
| CG591                     | <i>Ups2<sup>TAP</sup></i>  | S288c       | a   | <i>his3Δ1 leu2Δ0 met15Δ0 lys2Δ0 ura3Δ0 UPS2-TAP (kanMX)</i>                                          |
| CG593                     | <i>Ups1<sup>TAP</sup></i>  | S288c       | a   | <i>his3Δ1 leu2Δ0 met15Δ0 lys2Δ0 ura3Δ0 UPS1-TAP (kanMX)</i>                                          |
| CG597                     | <i>Ups2<sup>MYC</sup></i>  | S288c       | a   | <i>his3Δ1 leu2Δ0 met15Δ0 lys2Δ0 ura3Δ0 UPS2-Myc-7His (kanMX)</i>                                     |
| CG598                     | <i>Ups1<sup>MYC</sup></i>  | S288c       | a   | <i>his3Δ1 leu2Δ0 met15Δ0 lys2Δ0 ura3Δ0 UPS1-Myc-7His (kanMX)</i>                                     |
| CG626                     | <i>Ups2<sup>MYC</sup>↑</i> | S288c       | a   | <i>his3Δ1 leu2Δ0 met15Δ0 lys2Δ0 ura3Δ0 P<sub>Gal</sub>(NAT)-UPS2-Myc-7His (kanMX)</i>                |
| CG630                     | <i>Ups1<sup>MYC</sup>↑</i> | S288c       | a   | <i>his3Δ1 leu2Δ0 met15Δ0 lys2Δ0 ura3Δ0 P<sub>Gal</sub>(NAT)-UPS1-Myc-7His (kanMX)</i>                |
| CW1                       | <i>Δatp23</i>              | S288c       | a   | <i>his3Δ1 leu2Δ0 met15Δ0 lys2Δ0 ura3Δ0 Δatp23::HIS3MX6</i>                                           |
| CW128                     | <i>Δmdm35 Δups2</i>        | W303        | a   | <i>can1Δ100 his3Δ11,15 leu2Δ3,112 ura3Δ1 ade2Δ1 trp1Δ1 Δmdm35::HIS3 Δups2::NAT</i>                   |
| CW130                     | <i>Δups2</i>               | W303        | a   | <i>can1Δ100 his3Δ11,15 leu2Δ3,112 ura3Δ1 ade2Δ1 trp1Δ1 Δups2::NAT</i>                                |
| CW143                     | <i>Δups1</i>               | W303        | a   | <i>can1Δ100 his3Δ11,15 leu2Δ3,112 ura3Δ1 ade2Δ1 trp1Δ1 Δups1::NAT</i>                                |
| CW144                     | <i>Δmdm35 Δups1</i>        | W303        | a   | <i>can1Δ100 his3Δ11,15 leu2Δ3,112 ura3Δ1 ade2Δ1 trp1Δ1 Δmdm35::HIS3MX6 Δups1::NAT</i>                |
| CW3                       | <i>Δatp23</i>              | W303        | a   | <i>can1Δ100 leu2Δ3,112 ura3Δ1 ade2Δ1, trp1Δ1, Δatp23::HIS3MX6</i>                                    |
| CW343                     | <i>Mdm35↑</i>              | W303        | a   | <i>can1Δ100 his3Δ11,15 leu2Δ3,112 ura3Δ1 ade2Δ1 trp1Δ1 P<sub>Gal</sub>(NAT)-MDM35</i>                |
| CW385                     | <i>Δmdm35</i>              | S288c       | a   | <i>his3Δ1 leu2Δ0 met15Δ0 lys2Δ0 ura3Δ0 UPS1-9myc (HIS3) Δmdm35::NAT</i>                              |
| CW394                     | WT                         | S288c       | a   | <i>his3Δ1 leu2Δ0 met15Δ0 lys2Δ0 ura3Δ0 UPS1-9myc (HIS3) Ycplac111::ADH</i>                           |
| CW396                     | <i>Δmdm35 [MDM35]</i>      | S288c       | a   | <i>his3Δ1 leu2Δ0 met15Δ0 lys2Δ0 ura3Δ0 UPS1-9myc (HIS3) Δmdm35::NAT Ycplac111::ADH-Mdm35-500bp3'</i> |
| CW398                     | <i>Δmdm35</i>              | S288c       | a   | <i>his3Δ1 leu2Δ0 met15Δ0 lys2Δ0 ura3Δ0 UPS1-9myc (HIS3) Δmdm35::NAT Ycplac111::ADH</i>               |
| CW414                     | <i>Δmdm35 Δyme1</i>        | W303        | a   | <i>can1Δ100 his3Δ11,15 leu2Δ3,112 ura3Δ1 ade2Δ1 trp1Δ1 Δyme1::ADE2 Δmdm35::kanMX</i>                 |
| CW79                      | <i>Δatp23 Δyme1</i>        | W303        | a   | <i>can1Δ100 his3Δ11,15 Δatp23::HIS3 leu2Δ3,112 ura3Δ1 ade2Δ1 Δyme1::ADE2 trp1Δ1</i>                  |

|                |                                         |       |          |                                                                                                                                                                                                                                                |
|----------------|-----------------------------------------|-------|----------|------------------------------------------------------------------------------------------------------------------------------------------------------------------------------------------------------------------------------------------------|
| Euroscarf 3451 | $\Delta mgr1$                           | S288c | a        | <i>his3<math>\Delta</math>1 leu2<math>\Delta</math>0 met15<math>\Delta</math>0 ura3<math>\Delta</math>0 <math>\Delta mgr1::kanMX</math></i>                                                                                                    |
| Euroscarf 3464 | $\Delta prd1$                           | S288c | a        | <i>his3<math>\Delta</math>1 leu2<math>\Delta</math>0 met15<math>\Delta</math>0 ura3<math>\Delta</math>0 <math>\Delta prd1::kanMX</math></i>                                                                                                    |
| Euroscarf 4266 | $\Delta cym1$                           | S288c | a        | <i>his3<math>\Delta</math>1 leu2<math>\Delta</math>0 met15<math>\Delta</math>0 ura3<math>\Delta</math>0 <math>\Delta cym1::kanMX</math></i>                                                                                                    |
| Euroscarf 4731 | $\Delta pcp1$                           | S288c | a        | <i>his3<math>\Delta</math>1 leu2<math>\Delta</math>0 met15<math>\Delta</math>0 ura3<math>\Delta</math>0 <math>\Delta pcp1::kanMX</math></i>                                                                                                    |
| Euroscarf 6003 | $\Delta oma1$                           | S288c | a        | <i>his3<math>\Delta</math>1 leu2<math>\Delta</math>0 met15<math>\Delta</math>0 ura3<math>\Delta</math>0 <math>\Delta oma1::kanMX</math></i>                                                                                                    |
| Euroscarf 6555 | $\Delta mgr3$                           | S288c | a        | <i>his3<math>\Delta</math>1 leu2<math>\Delta</math>0 met15<math>\Delta</math>0 ura3<math>\Delta</math>0 <math>\Delta mgr1::kanMX</math></i>                                                                                                    |
| Euroscarf 732  | $\Delta imp1$                           | S288c | a        | <i>his3<math>\Delta</math>1 leu2<math>\Delta</math>0 met15<math>\Delta</math>0 ura3<math>\Delta</math>0 <math>\Delta imp1::kanMX</math></i>                                                                                                    |
| PD17           | Ups2 <sup>HA</sup>                      | S288c | a        | <i>his3<math>\Delta</math>1 leu2<math>\Delta</math>0 (met15<math>\Delta</math>0/MET15?) lys2<math>\Delta</math>0 ura3<math>\Delta</math>0 UPS2-6xHA (kanMX)</i>                                                                                |
| PD49           | $\Delta ups1$                           | S288c | $\alpha$ | <i>his3<math>\Delta</math>1 leu2<math>\Delta</math>0 ura3<math>\Delta</math>0 <math>\Delta ups1::HYG</math></i>                                                                                                                                |
| PD94           | Ups2 <sup>HA</sup><br>$\Delta ups1$     | S288c | a        | <i>his3<math>\Delta</math>1 leu2<math>\Delta</math>0 (met15<math>\Delta</math>0/MET15?) lys2<math>\Delta</math>0 ura3<math>\Delta</math>0 UPS2-6xHA (kanMX) <math>\Delta ups1::HYG</math></i>                                                  |
| PY102          | WT                                      | S288c | a        | <i>his3<math>\Delta</math>1 leu2<math>\Delta</math>0 met15<math>\Delta</math>0 lys2<math>\Delta</math>0 ura3<math>\Delta</math>0 UPS2-9myc (HIS3)</i>                                                                                          |
| PY103          | WT                                      | S288c | a        | <i>his3<math>\Delta</math>1 leu2<math>\Delta</math>0 met15<math>\Delta</math>0 lys2<math>\Delta</math>0 ura3<math>\Delta</math>0 UPS1-9myc (HIS3)</i>                                                                                          |
| PY117          | $\Delta mdm35$                          | S288c | a        | <i>his3<math>\Delta</math>1 leu2<math>\Delta</math>0 met15<math>\Delta</math>0 lys2<math>\Delta</math>0 ura3<math>\Delta</math>0 UPS2-9myc (HIS3) <math>\Delta mdm35::NAT</math></i>                                                           |
| PY127          | WT                                      | S288c | a        | <i>his3<math>\Delta</math>1 leu2<math>\Delta</math>0 met15<math>\Delta</math>0 lys2<math>\Delta</math>0 ura3<math>\Delta</math>0 UPS2-9myc (HIS3) Ycplac111::ADH</i>                                                                           |
| PY128          | WT<br>[MDM35]                           | S288c | a        | <i>his3<math>\Delta</math>1 leu2<math>\Delta</math>0 met15<math>\Delta</math>0 lys2<math>\Delta</math>0 ura3<math>\Delta</math>0 UPS2-9myc (HIS3) Ycplac111::ADH-Mdm35-500bp3'</i>                                                             |
| PY129          | $\Delta mdm35$                          | S288c | a        | <i>his3<math>\Delta</math>1 leu2<math>\Delta</math>0 met15<math>\Delta</math>0 lys2<math>\Delta</math>0 ura3<math>\Delta</math>0 UPS2-9myc (HIS3) <math>\Delta mdm35::NAT</math> Ycplac111::ADH</i>                                            |
| PY130          | $\Delta mdm35$<br>[MDM35]               | S288c | a        | <i>his3<math>\Delta</math>1 leu2<math>\Delta</math>0 met15<math>\Delta</math>0 lys2<math>\Delta</math>0 ura3<math>\Delta</math>0 UPS2-9myc (HIS3) <math>\Delta mdm35::NAT</math> Ycplac111::ADH-Mdm35-500bp3'</i>                              |
| PY132          | $\Delta ups2$<br>$\Delta yme1$          | S288c | a        | <i>his3<math>\Delta</math>1 leu2<math>\Delta</math>0 met15<math>\Delta</math>0 lys2<math>\Delta</math>0 ura3<math>\Delta</math>0 <math>\Delta ups2::NAT</math> <math>\Delta yme1::kanMX</math></i>                                             |
| PY153          | $\Delta ups1$<br>$\Delta yme1$          | S288c | $\alpha$ | <i>his3<math>\Delta</math>1 leu2<math>\Delta</math>0 ura3<math>\Delta</math>0 <math>\Delta ups1::HYG</math> <math>\Delta yme1::kanMX</math></i>                                                                                                |
| PY64           | $\Delta mdm35$<br>UPS2 <sup>MYC</sup> ↑ | S288c | a        | <i>his3<math>\Delta</math>1 leu2<math>\Delta</math>0 met15<math>\Delta</math>0 lys2<math>\Delta</math>0 ura3<math>\Delta</math>0 PGal(NAT)-UPS2-Myc-7His (kanMX) <math>\Delta mdm35::HIS3MX6</math></i>                                        |
| VI A4          | $\Delta yme1$                           | W303  | $\alpha$ | <i>can1<math>\Delta</math>100 his3<math>\Delta</math>11,15 leu2<math>\Delta</math>3,112 ura3<math>\Delta</math>1 ade2<math>\Delta</math>1 trp1<math>\Delta</math>1 <math>\Delta yme1::HIS3MX6</math></i>                                       |
| VI A5          | $\Delta yme1$                           | W303  | a        | <i>can1<math>\Delta</math>100 his3<math>\Delta</math>11,15 leu2<math>\Delta</math>3,112 ura3<math>\Delta</math>1 ade2<math>\Delta</math>1 trp1<math>\Delta</math>1 <math>\Delta yme1::ADE2</math></i>                                          |
| YTE26          | Yme1 <sup>E541Q</sup>                   | W303  | $\alpha$ | <i>ade2<math>\Delta</math>1 his3<math>\Delta</math>11,15 leu2<math>\Delta</math>112 trp1<math>\Delta</math>1 ura3<math>\Delta</math>52 can1<math>\Delta</math>100 <math>\Delta yme1::HIS3</math> pRS314-Yme1E541Q</i>                          |
| YTE89          | His-Yme1 <sup>E541Q</sup>               | W303  | $\alpha$ | <i>ade2<math>\Delta</math>1 his3<math>\Delta</math>11,15 leu2<math>\Delta</math>112 trp1<math>\Delta</math>1 ura3<math>\Delta</math>52 can1<math>\Delta</math>100 <math>\Delta yme1::HIS3</math> pRS314-Yme1(1-50)-6His-Yme1(51-747)-E541Q</i> |
